1 **Promoter-specific changes in initiation, elongation and homeostasis of histone**

2 **H3 acetylation during CBP/p300 Inhibition**

3

4 Hsu E<sup>1,2</sup>, Zemke NR<sup>1,3</sup>, Berk AJ<sup>1,4</sup>

5 1. Molecular Biology Institute, UCLA, Los Angeles USA

6 2. current address: Department of Biochemistry and Molecular Medicine and the Norris

7 Comprehensive Cancer Center, Keck School of Medicine, University of Southern

8 California, Los Angeles, CA 90089, USA

9 3. current address: Department of Cellular and Molecular Medicine, University of

10 California, San Diego School of Medicine, La Jolla, CA, USA.

11 4. Department of Microbiology, UCLA, Los Angeles USA

## 12 **Summary**

13 Regulation of RNA Polymerase II (Pol2) elongation in the promoter proximal region is  
14 an important and ubiquitous control point for gene expression in metazoan cells. We  
15 report that transcription of the adenovirus 5 E4 region is regulated during the release of  
16 paused Pol2 into productive elongation by recruitment of the super elongation complex  
17 (SEC), dependent on promoter H3K18/27 acetylation by CBP/p300. We also establish  
18 that this is a general transcriptional regulatory mechanism for ~6% of genes expressed  
19 with FPKM>1 in primary human airway epithelial cells. We observed that a homeostatic  
20 mechanism maintains promoter, but not enhancer H3K18/27ac in response to extensive  
21 inhibition of CBP/p300 acetyl transferase activity by the highly specific small molecule  
22 inhibitor A-485. Further, our results suggest a function for BRD4 association at  
23 enhancers in regulating paused Pol2 release at nearby promoters. Taken together, our  
24 results uncover processes regulating transcriptional elongation by promoter region  
25 histone H3 acetylation and homeostatic maintenance of promoter, but not enhancer,  
26 H3K18/27ac in response to inhibition of CBP/p300 acetyl transferase activity.

27

## 28 **Introduction**

29 In addition to RNA polymerase II (Pol2) pre-initiation complex (PIC) assembly  
30 and initiation, the transition from promoter-proximal paused Pol2 to productively  
31 elongating Pol2 is an essential step in gene transcription and an important process in  
32 the overall multi-component orchestration of gene expression (1–3). After the  
33 recruitment of Pol2 to a promoter by its general transcription factors and assembly of a  
34 PIC (4, 5), transcription initiation occurs concurrently with TFIIH phosphorylation of Ser5

35 of the Pol2 heptapeptide repeat C-terminal domain (CTD) (6). In metazoan cells, Pol2  
36 then transcribes approximately 30-60 bases downstream of the transcription start site  
37 (TSS) and pauses because it is bound by negative elongation factor (NELF) and DRB-  
38 sensitivity inducing factor (DSIF, Spt4 and Spt5 in *S. cerevisiae*) (7, 8). Recruitment of  
39 P-TEFb and its enzymatic subunits CDK9-Cyclin T results in the phosphorylation of  
40 NELF, DSIF, and Ser2 of the Pol2 CTD, whereupon NELF dissociates and Pol2 is  
41 released and proceeds to productive elongation (6–9).

42 Histone acetylation is well known to contribute to a permissive chromatin state for  
43 Pol2 PIC assembly at active promoters, and there is recently published work concerning  
44 its function in facilitating transcriptional elongation as well. For example, the chromatin  
45 reader protein BRD4 is thought to recruit P-TEFb (CDK9-Cyclin T) to promoters and  
46 serves as a Pol2 elongation factor dependent on its interactions with acetylated histone  
47 lysines through its bromodomains (10). In addition, H3 acetylation mediated by the  
48 *Drosophila* CBP ortholog stimulates productive elongation past the +1 nucleosome (11).  
49 Recruitment of the yeast histone chaperone FACT by acetylated H3 has also been  
50 shown to stimulate elongation (12).

51 The SEC is a multi-subunit complex comprised of P-TEFb (CDK9-Cyclin T) along  
52 with AF4/FMR2 proteins AFF1/4, ELL family members ELL1/2/3, ELL-associated factors  
53 EAF1/2, and one or the other highly homologous proteins AF9 or ENL containing  
54 YEATS acetyl-lysine-binding domains (13). There are various forms of the SEC,  
55 including SEC-like complexes that contain different combinations of elongation factors  
56 suggesting diversity in their regulatory mechanisms (13). P-TEFb, a central  
57 serine/threonine-kinase, an AFF scaffold protein, and ENL or AF9 are consistent

58 components of SEC complexes. ENL and AF9 have been functionally linked to SEC  
59 recruitment to acetylated chromatin via their YEATS domains (14, 15). The SEC then  
60 stimulates transcription elongation through interactions with the PAF1 complex (16),  
61 which blocks NELF-binding to Pol2 (6), and DOT1L, which deposits the active  
62 chromatin modification H3K79me in the first intron (14, 17). Importantly, AF9 and ENL  
63 YEATS domains bind to active chromatin marks H3K9ac and H4K15ac (15), and to a  
64 lesser extent, H3K18/27ac (14), and are essential for SEC-dependent activation of a  
65 luciferase reporter driven by the HIV-1 LTR (16). Despite these conclusions, the  
66 function of histone acetylation during the transition from promoter-proximal paused to  
67 productively elongating Pol2 remains incompletely understood.

68         We previously reported that p300/CBP acetylation of H3K18 and K27 in the two  
69 to three nucleosomes spanning the transcription start site (TSS) had very different  
70 effects on distinct steps in transcription from different human adenovirus 5 (HAdV-5)  
71 early promoters (19). At the E3 promoter, loss of H3K18/27ac in the promoter region  
72 had little effect on PIC assembly, and the rate of E3 mRNA synthesis was only modestly  
73 reduced (<2-fold) compared to transcription activated by wt E1A which induces  
74 H3K18/27ac at the early viral promoters. In contrast, PIC assembly at the E2early  
75 promoter was almost eliminated by loss of promoter H3K18/27ac, and E2 mRNA  
76 synthesis was undetectable at 12 h p.i. (19). For E4, loss of promoter H3K18/27ac had  
77 little effect on PIC assembly, but caused a significant (~10-fold) decrease in E4  
78 transcription at 12 h p.i. (19). This result was particularly striking as it suggested that E4  
79 transcription is regulated by promoter H3K18/27 acetylation at a step in transcription

80 subsequent to PIC assembly, possibly during release of promoter-proximal paused  
81 Pol2.

82 To investigate the function of H3K18/27ac in transcriptional elongation at E4, we  
83 mapped the association of transcriptionally active Pol2 on the Ad5 genome using GRO-  
84 seq (Global Run-On sequencing) (1). We found defective paused Pol2 release at E4 in  
85 cells expressing an E1A mutant (“E1A-DM”) with polyalanine substituted for two highly  
86 acidic regions of the E1A activation domain (AD) that each mediate an interaction with  
87 p300/CBP (19). ChIP-seq for BRD4 and SEC components CDK9, AF9, and ENL  
88 revealed decreased SEC recruitment to E4 by E1A-DM compared to wt E1A. Using the  
89 specific small molecule inhibitor of CBP/p300 acetyl-transferase activity A-485 (20), we  
90 determined that CBP/p300 HAT activities are essential for maximal paused Pol2 release  
91 and SEC recruitment at the E4 promoter, but not at the E3 promoter.

92 We then extended our studies to the human genome, where we found that 2 h of  
93 A-485 treatment resulted in hypoacetylation of total cell H3K18/27 to a new,  
94 hypoacetylated steady-state. This was associated with defective pause-release at a  
95 subset of active genes (~6%) where promoter H3K18/27ac was decreased by the drug.  
96 Differences in the sensitivity of transcription from different promoters to H3K18/27ac  
97 correlated with differences in SEC component association with the genes after A-485  
98 treatment. This was similar to what we had observed for the HAdV-5 E4 promoter  
99 during activation by the multi-site E1A mutant (DM-E1A) with mutations in the E1A-AD  
100 acidic peptides required for p300/CBP binding to the E1A-AD. We also found that at a  
101 subset of enhancers with greatly decreased H3K18/27ac in response to A-485  
102 treatment, H3K9ac is sufficient for BRD4 binding and stimulation of Pol2 pause-release.

103 Based on these results, we propose mechanisms of BRD4 and SEC recruitment by  
104 histone H3 acetylation during the transition from promoter-proximal paused to  
105 productively elongating Pol2, and report a homeostatic process that maintains promoter  
106 H3K18/27ac.

107

## 108 **Results**

109 *CBP/p300 acetylation of promoter histone H3K18 and K27 stimulates paused Pol2*  
110 *release at the human adenovirus 5 E4 promoter, but is not required at the E3 promoter.*

111 Transcription from human adenovirus 5 (HAdV-5) early promoters is activated by the  
112 first viral proteins expressed following infection, the E1A isoforms, primarily large E1A  
113 (Figure S1A). While transcriptional activation from the viral early promoters is entirely  
114 dependent on the interaction of the large E1A isoform with the mediator of transcription  
115 complex, transcription of E4 is stimulated an additional ten-fold through interactions  
116 between CBP/p300 and two highly acidic regions immediately flanking the E1A  
117 mediator-binding region (large E1A aa residues 133—138 and 189—200 Figure S1(a,b)  
118 (19). Separate Ad5 expression vectors were constructed that express the wt E1A region  
119 from the wt E1A promoter/enhancer region, or DM-E1A with several mutations that  
120 convert these acidic peptides in wt E1A to polyAla (Fig S1b).

121 To analyze the effects of promoter H3K18/27ac on Pol2 elongation through the  
122 early Ad5 genes, we applied the GRO-seq method, which reveals the position and  
123 direction of transcribing Pol2 by BrU-labeling of 3'-ends of nascent RNA transcripts in  
124 isolated nuclei (1). The nuclei were first washed with the non-ionic detergent Sarkosyl to  
125 remove proteins from chromatin that block transcription elongation and to prevent Pol2

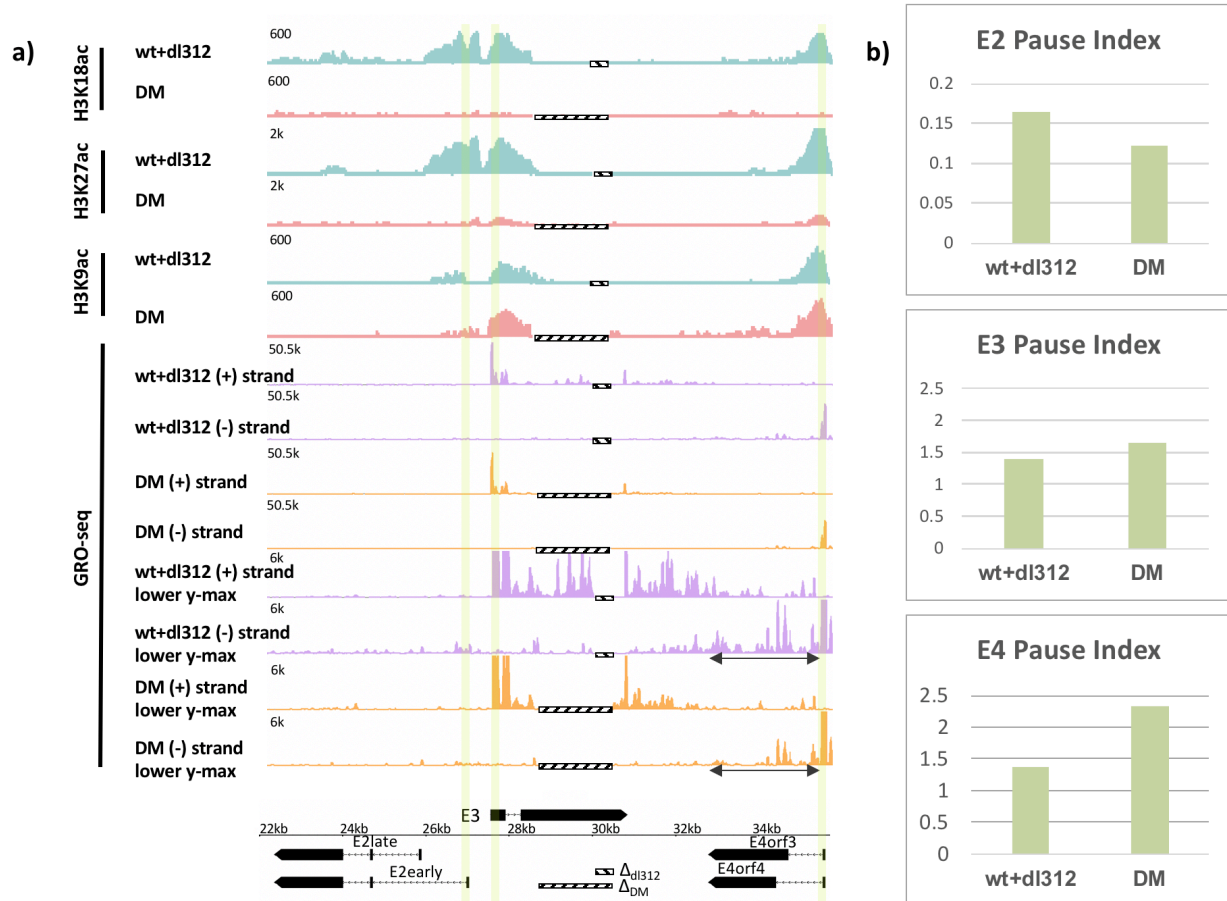

126

127 **Figure 1: Promoter H3K18/27 acetylation activated by E1A-AD-CBP/p300**

128 **interactions stimulates paused Pol2 release at adenovirus promoter E4.**

129 **(a)** (bottom) map of the major HAdV-5 early E2, E3 and E4 mRNAs. Deletions in the E3

130 regions of *dl312* and the E1A-DM vector are shown by cross-hatched horizontal bars.

131 Vertical stripes highlighted in yellow indicate promoter proximal regions. GRO-seq

132 counts from primary HBTECs infected with wt+dl312 or DM vectors at 12 h post-

133 infection (p.i.), were plotted on the Ad5 genome with H3K18ac, H3K27ac and H3K9ac

134 ChIP-seq data (19). GRO-seq tracks are shown for the two viral DNA strands (+,

135 transcribed to the right; and -, transcribed to the left), with two different y-axis scales to

136 allow visualization of high and low amplitude peaks. The double-headed arrows in the  
137 GRO-seq plots in the E4 region refer to gene body regions discussed in the text.

138 **(b)** Pause indexes for E2, E3, and E4 in cells expressing wt E1A or DM-E1A. Pause  
139 index is the ratio of: reads in the promoter region (TSS to +200) to reads in the gene  
140 body (+200 to TTS).

141  
142 initiation, so only actively transcribing RNA polymerases at the time the nuclei were  
143 isolated produce BrU-labeled RNA (1). To avoid possible effects of cellular mutations  
144 in stable cell lines, we performed these studies in primary human bronchial-tracheal  
145 epithelial cells (HBTECs) derived from human adult lung transplant donors. These  
146 HBTECs are a cell culture model for the airway epithelial cells infected by HAdV-5 in  
147 humans.

148 We infected HBTECs with the wt E1A vector, and, separately, the DM-E1A  
149 vector expressing mutant E1A with polyAla substitutions of the two highly acidic  
150 peptides flanking CR3 (see Figure S1b). Wt E1A binds CBP/p300 through these highly  
151 acidic peptides, inducing histone H3 acetylation at K18 and K27 by the CBP/p300 acetyl  
152 transferase domain, in the viral E2early, E3, and E4 promoter regions (19). In cells  
153 expressing DM-E1A, which does not interact in vivo with p300 though the E1A  
154 activation domain (E1A-AD) (19), there was far less H3K18/27ac in these early viral  
155 promoter regions (Figure 1a). To express equal steady-state levels of the wt E1A and  
156 less stable DM-E1A proteins, infections were performed at a higher multiplicity of  
157 infection for the DM-E1A vector than for the wt E1A vector (19) (Figure S1(c)). Cells  
158 infected with the wt E1A vector were also co-infected with sufficient E1A deletion mutant



159 *dI312* to maintain the same number of viral DNA molecule templates for the viral early  
160 regions (~100 viral DNA molecules per nucleus) in cells expressing the same level of wt  
161 E1A and the DM-E1A protein (19) (Figure S1(c)).

162 GRO-seq data at 12 hours post infection (h pi) with the vector expressing wt E1A  
163 revealed peaks of paused Pol2 with the expected orientation and location of promoter-  
164 proximal paused Pol2, ~40-60 bp downstream from the E3 and E4 TSSs (Figures 1a,  
165 highlighted, and 2a). At 12h pi, very low GRO-seq signal was observed at the E2 early  
166 promoter or within the E2 gene body in wt E1A expressing cells compared to E3 and E4  
167 (Figure 1a). This was probably because E2early transcription is delayed compared to  
168 E3 and E4 in these primary cells, and increases by 18 h p.i. (19). The low GRO-seq  
169 signal in the E2early promoter region and gene body was decreased further in cells  
170 expressing DM-E1A compared to wt E1A (Figure 1a), supporting our previous  
171 conclusion that E2early transcription is regulated by H3K18/27ac in the promoter region  
172 because it is required for rapid PIC assembly (19).

173 To determine the degree of promoter-proximal pausing in the E3 and E4  
174 promoter regions where Pol2 association is detected by ChIP-seq at 12 h pi (19), we  
175 calculated the Pol2 pausing index (PI, (1)). The PI equals the number of GRO-seq  
176 reads in the promoter-proximal region (TSS to +200 bp) divided by the total GRO-seq  
177 reads in the gene body (+201 to TTS). The GRO-seq reads in the promoter-proximal  
178 region reflect the amount of promoter-proximal paused Pol2 at the time the nuclei were  
179 isolated, while the GRO-seq reads in the gene body reflect the amount of elongating  
180 Pol2 subsequent to pause-release. Therefore, an increase in a gene's PI indicates a  
181 reduced rate of promoter-proximal pause-release.

182           After activation by DM-E1A, the PI at E4 increased almost 2-fold compared to E4  
183 transcription activated by wt E1A (wt PI=1.37 vs. DM PI= 2.33) (Figure 1b). The vectors  
184 expressing wt E1A and DM-E1A had different size deletions in E3 due to the details of  
185 their constructions (Figure 1a, bottom), but the calculation of PI for E3 was based on the  
186 regions of E3 common to both vectors. In contrast to E4, there was much less change in  
187 PI at E3 (wt PI=1.41 vs. DM PI=1.65) where promoter H3K18/27 acetylation had only a  
188 modest effect on transcription (19) (Figure 1b). Similar to E3, the low level of GRO-seq  
189 counts at the E2early promoter region showed little difference in PI between wt E1A and  
190 DM-E1A (wt PI=0.164 vs. DM PI=0.123) (Figure 1b), suggesting that H3K18/27  
191 acetylation at the E2early promoter primarily promotes Pol2 initiation. Therefore, loss of  
192 H3K18/27 promoter acetylation resulted in a smaller defect on promoter-proximal Pol2  
193 pause-release at the E3 and E2early promoters than at the E4 promoter.

194

195 *Decreased Pol2 pause-release in the E4 promoter-proximal region correlates with*  
196 *decreased association of SEC subunits CDK9, AF9, and ENL.*

197 Phosphorylation of Ser5 on the Pol2 CTD by the CDK7 subunit of TFIIH occurs during  
198 transcription initiation, and subsequent CTD-Ser2, NELF, and DSIF phosphorylation by  
199 the CDK9 subunit of P-TEFb allows release of Pol2 arrested by NELF binding in the  
200 promoter-proximal region, and the transition to productive elongation (6, 7, 21). To  
201 characterize these mechanisms on the HAdV-5 genome, we performed ChIP-seq for  
202 Pol2 Ser5-P, Pol2 Ser2-P, NELF, and CDK9 in cells expressing wt E1A (Figure 1a). At  
203 E2early, Ser 5-P peaked near the TSS and decreased throughout the gene body, a  
204 distribution that is typical in yeast which also has short genes with few introns (22), as

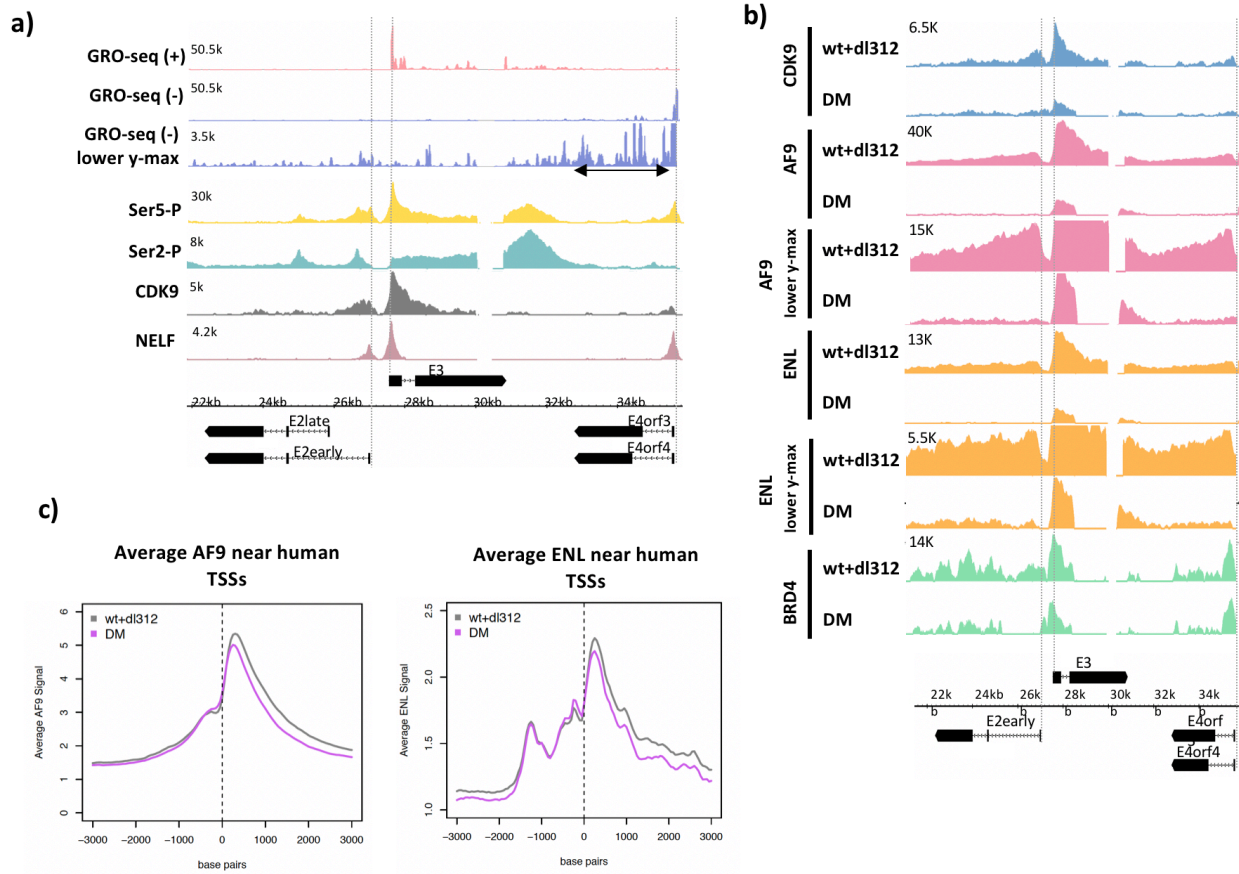

205

206 **Figure 2: Ser5-P, Ser2-P, CDK9, NELF, and SEC subunits on the Ad5 genome**

207 (a) Ser5-P, Ser2-P, CDK9, and NELF ChIP-seq plotted with GRO-seq in cells

208 expressing wt E1A.

209 (b) CDK9, AF9, ENL, and BRD4 ChIP-seq in cells expressing wt or DM E1A. AF9 and

210 ENL ChIP-seqs are plotted with 2 different y-axes.

211 (c) Average plots of AF9 and ENL ChIP-seq counts near TSSs on the human genome.

212

213 well as mouse ES cells (21) with the much longer, multi-exon, long intron genes typical

214 of vertebrates. We observed two Ser2-P peaks in the E2early gene body, one just

215 downstream of the TSS, likely indicating paused Pol2. Another Ser2-P peak occurred

216 over the E2early second exon. A small Ser5-P peak was also observed at this position

217 (Figure 2a). These Pol2 peaks may be explained by a reduction in elongation rate over  
218 exons, proposed to influence splice site recognition and spliceosome assembly (23, 24).  
219 Such a decrease in Pol2 elongation rate over the short E2 second exon would cause an  
220 increase in the steady-state level of Pol2 over the exon, potentially leading to the  
221 increase in the Pol2 ChIP-seq signal observed over the E2 second exon.

222 Both CDK9 and NELF peaks occurred at the expected E2early, E3, and E4  
223 pause sites ~40 bp downstream of the TSSs (Figure 2a). Broad enrichment of Ser2-P  
224 and Ser5-P Pol2 also was observed downstream of the E3 and E4 poly(A) sites.  
225 Increased Pol2 Ser2-P and Ser5-P downstream from cellular poly(A) sites is observed  
226 at most cellular genes in mammalian cells, and is thought to result from a decrease in  
227 Pol2 elongation rate following nascent RNA cleavage at the poly(A) site (21).

228 We next asked if defective paused Pol2 release after activation by DM-E1A was  
229 due to decreased recruitment of P-TEFb containing complexes. A large percentage of  
230 P-TEFb exists in complex with the 7SK snRNP where its CDK9 kinase activity is  
231 inhibited and it is sequestered from chromatin (25–27). Eviction of P-TEFb from the 7SK  
232 snRNP enables its integration into complexes with activated CDK9 kinase activity,  
233 including the super elongation complex (SEC) and a complex comprised of P-TEFb and  
234 BRD4 (28, 29). Integration into these complexes allows active CDK9 to be targeted to  
235 promoters and enhancers where it phosphorylates its targets and stimulates paused  
236 Pol2 release (10). To determine the effects of H3K18/27ac on SEC and P-TEFb-BRD4  
237 recruitment to early adenovirus genes, we performed ChIP-seq for CDK9, AF9, ENL,  
238 and BRD4 on the HAdV-5 genome in infected cells (Figure 2b). Reduced H3K18/27ac  
239 in DM-E1A vector-infected cells compared to wt E1A-expressing cells correlated with

240 decreased CDK9, AF9, and ENL association with the early viral promoters and gene  
241 bodies compared to cells expressing wt E1A (Figure 2b). Importantly, we did not  
242 observe decreases in average AF9 and ENL association with TSSs of most human  
243 genes in the same infected cells expressing DM-E1A, demonstrating the specificity of  
244 this effect on SEC subunit association at the early viral promoters (Figure 2c). BRD4  
245 association at the E2early, E3, and E4 TSSs changed very little in cells infected with the  
246 DM-E1A vector compared to the wt E1A vector, although it was reduced to about 50%  
247 the level with wt E1A within the transcription units (Figure 2b). These data suggest that  
248 H3K18/27ac facilitates paused Pol2 release at E4 by recruitment of the SEC. In  
249 contrast, transcription initiation at E3 requires much less SEC recruitment to achieve a  
250 transcription rate near that in control DMSO-treated cells (Figures 1 and 2b) .

251

252 *CBP/p300 acetyl-transferase activity is required for efficient Pol2 pause-release and*  
253 *recruitment of AF9, ENL, and BRD4 at E4*

254 A-485 is a potent and specific small molecule inhibitor of p300/CBP acetyl transferase  
255 activity that competes with acetyl-CoA for binding to the acetyl transferase domain  
256 active site (20). Decreased total cell H3K18ac after A-485 treatment in HBTECs was  
257 confirmed by western blot (Figure 3a). ChIP-seq for H3K9ac, H3K18ac, and H3K27ac  
258 on the HAdV-5 genome in wt E1A vector-infected cells treated with A-485 for 2 h  
259 demonstrated inhibition of H3K18/27ac, as expected (20, 30), and slight inhibition of  
260 H3K9ac at early viral promoters (Figure 3b). As a measure of the transcription rate of  
261 the early viral genes, we assayed pre-mRNA levels using qRT-PCR of intronic RNA in  
262 RNA isolated from HBTECs expressing wt E1A treated with 10  $\mu$ M A-485 or control

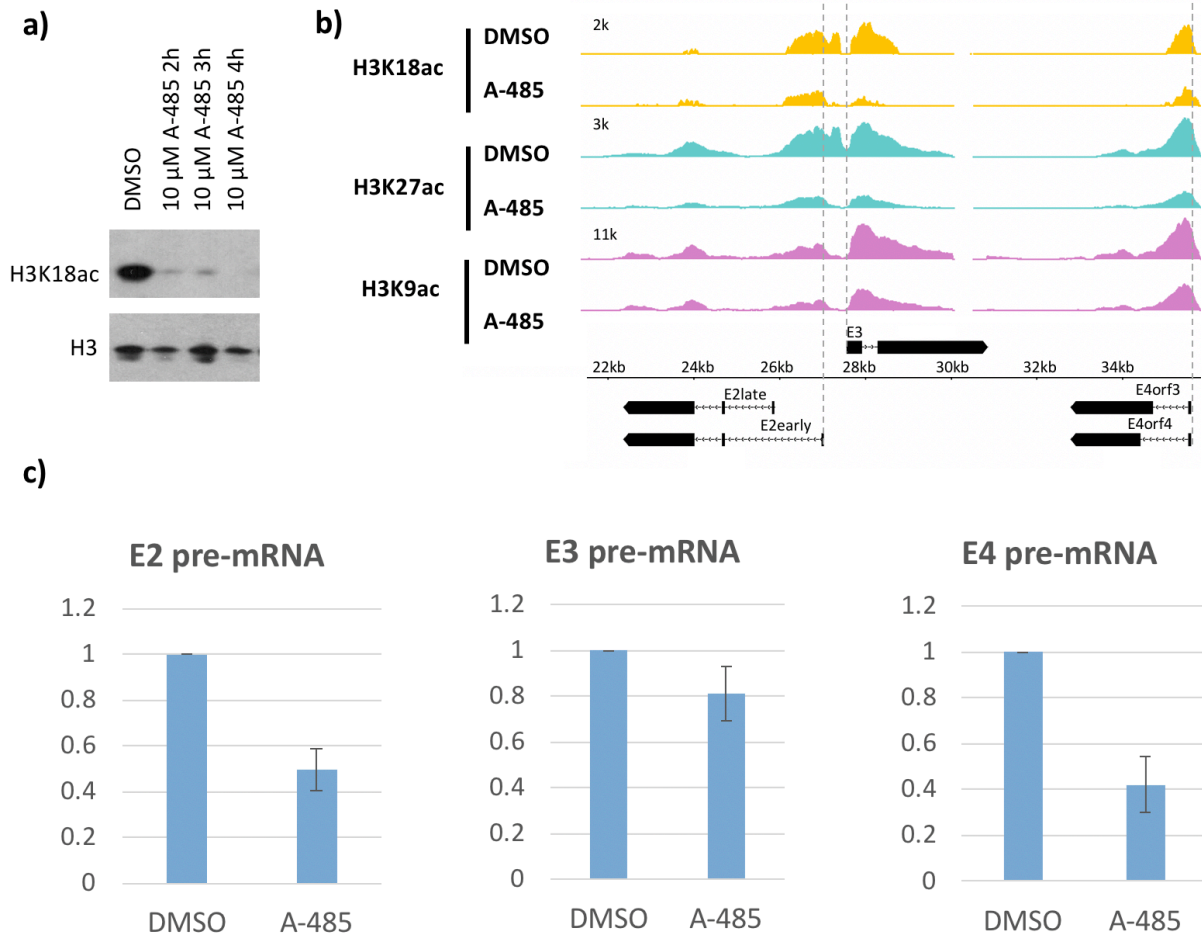

263

264 **Figure 3: CBP/p300 HAT inhibitor A-485 causes H3 hypoacetylation and**  
265 **decreased early viral gene expression**

266 (a) Western blot for H3K18ac and total H3 in HBTECs treated with 10uM A-485 after 2,  
267 3, or 4 hours.

268 (b) H3K18ac, H3K27ac, and H3K9ac ChIP-seq at early viral promoters in cells treated  
269 with 10uM A-485 for 2 hours.

270 (c) qRT-PCR for E2early, E3, and E4 pre-mRNA transcripts in cells treated with 10uM  
271 A-485 for 2 hours.

272 DMSO vehicle alone for 2h. We observed decreases in E2early and E4 pre-mRNA after  
273 A-485 treatment, while E3 pre-mRNA was decreased only moderately (Figure 3c). This  
274 result confirms again that E3 transcription is less dependent on promoter region  
275 H3K18/27 acetylation than transcription from the E2early and E4 promoters.

276 We calculated the pausing indices for transcription of the early viral genes  
277 (Figures 4a,b). There was little difference in PI with A-485 treatment at the E2early  
278 (DMSO PI=0.13, A-485 PI=0.12) or E3, (DMSO PI=1.20, A-485 PI=1.19) promoters, but  
279 a clear increase in PI was observed for E4 (DMSO PI=0.79, A-485 PI=1.13) (Figure 4b).  
280 These results indicate decreased release of paused Pol2 after A-485-induced E4  
281 promoter H3K18/27 hypoacetylation. Overall, our results indicate that CBP/p300 HAT  
282 activity is necessary for efficient promoter-proximal paused Pol2 release in E4 and are  
283 consistent with our results for E4 activation by DM-E1A, where decreased promoter  
284 H3K18/27 acetylation also correlated with decreased release of promoter-proximal Pol2  
285 (Figure 1a, bottom).

286 To determine if inhibition of p300 HAT activity resulted in defective SEC  
287 recruitment at E4, we performed AF9, ENL, and BRD4 ChIP-seq in cells infected with  
288 the wt E1A vector after DMSO or A-485 treatment. Similar to cells expressing DM E1A,  
289 we observed decreases in AF9 and ENL association at the E2early, E3, and E4  
290 promoter regions in cells treated with A-485 (Figure 4a). We also observed decreased  
291 BRD4 throughout the transcribed early regions. These data indicate that H3K18/K27  
292 acetylation by CBP/p300 promotes BRD4 and SEC complex association with viral  
293 chromatin. This association of BRD4 and SEC complexes with E4 chromatin requires  
294 H3K18/27 acetylation by the CBP/p300 acetyl-transferase catalytic domain targeted to

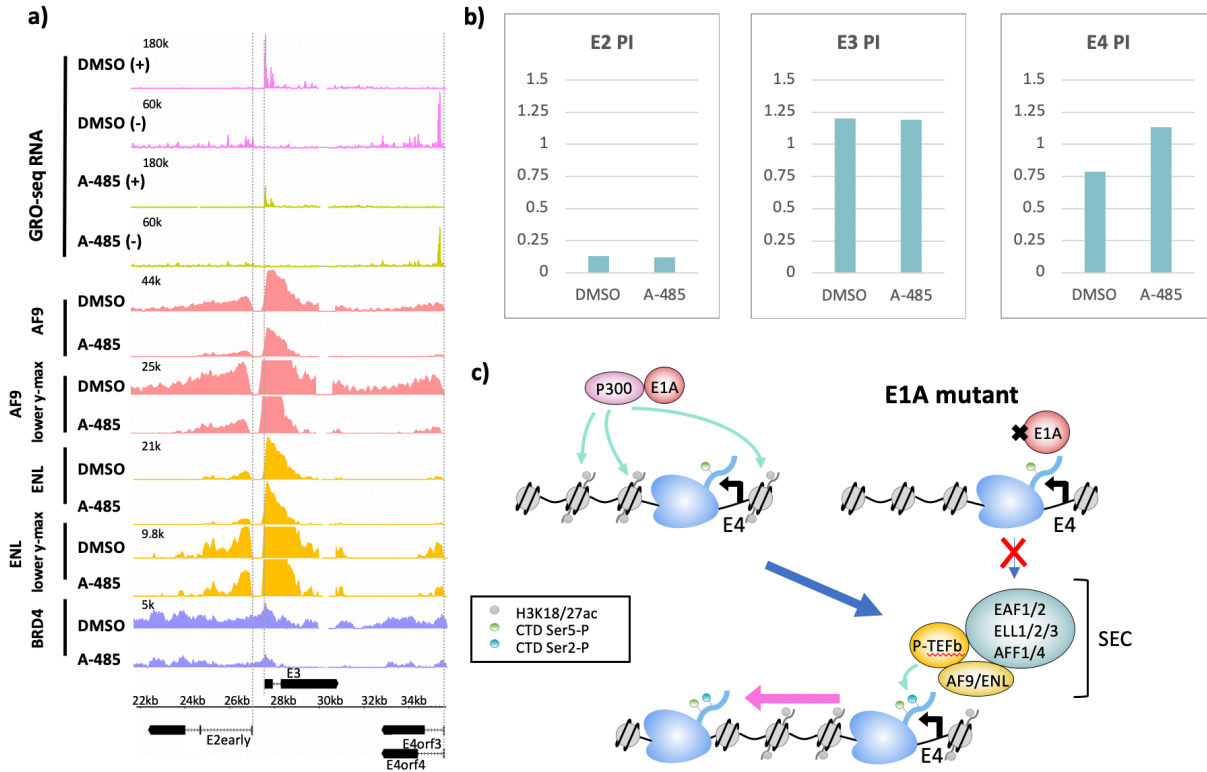

295

296 **Figure 4: CBP/p300 HAT inhibition by A-485 results in defective PolII pause-**  
 297 **release and decreased SEC and BRD4 binding at E4.**

298 (a) GRO-seq in cells expressing wt E1A treated with DMSO or 10 $\mu$ M A-485 for 2 hours.  
 299 GRO-seq tracks are plotted with ChIP-seq for AF9, ENL, and BRD4 in cells treated with  
 300 DMSO or 10  $\mu$ M A-485 for 2h. Both AF9 and ENL ChIP-seq tracks are shown with two  
 301 different y-axes.

302 (b) Pause indexes for E2early, E3, and E4 in cells treated with DMSO vs. A-485.

303 (c) Model for regulation of E4 elongation by SEC recognition of CBP/p300-E1A  
 304 mediated H3K18/27ac .

305

306



307 the early viral promoters by the interaction between CBP/p300 and the E1A-AD acidic  
308 regions (Figure 4c).

309

310 *CBP/p300 HAT inhibition by A-485 affects H3 acetylation of cellular chromatin*

311 *differently at promoters and enhancers*

312 To determine if the effects of H3K18/27ac on Pol2 pause-release at E4 is a general  
313 mechanism that also applies to transcription of cellular genes, we shifted our study to  
314 the human genome. First, we characterized the changes in H3K18/27ac in HBTECs  
315 after 2h treatment with 10  $\mu$ M A-485. Western blotting demonstrated an extensive  
316 decrease in total cellular H3K18ac which approached steady-state by 2 h after addition  
317 of A-485, as expected (20, 30) (Figure 3a). Localization of the remaining H3K18ac and  
318 H3K27ac was determined by separate ChIP-seq analyses with antibody specific for  
319 either H3K18ac or H3K27ac. These results showed that some sites of H3K18/27ac  
320 were far more resistant to A-485 treatment than others. Comparing the average signals  
321 for H3K18ac and H3K27ac at all TSSs and enhancer peaks (peaks >2.5kb from the  
322 nearest TSS), we observed the expected decreases in H3K18ac and H3K27ac by A-  
323 485 at enhancer peaks (Figure 5a). However, we observed a surprising increase in the  
324 average level of H3K18ac and H3K27ac at all TSSs in cells treated with A-485 (Figure  
325 5a). These observations indicate that homeostatic mechanisms function to maintain  
326 H3K18/27ac at promoters when CBP/p300, the principle cellular acetyl transferases for  
327 these sites (30–32), are extensively inhibited.

328

329



340 *A-485 affects cellular genes during both transcriptional initiation and elongation*

341 We were also curious about whether A-485 treatment affected transcription of human  
342 genes during both initiation and elongation as we had observed for the HAdV-5  
343 genome, and whether or not there are variations in the effect of A-485 on initiation  
344 versus elongation at different human promoters, as observed on the HAdV-5 genome.

345 GRO-seq reads from control DMSO and A-485 treated cells were aligned to the  
346 human genome to determine the fraction of genes affected by A-485 at different stages  
347 in transcription. We limited our analysis to protein coding transcription units with active  
348 promoters containing at least 20 GRO-seq counts in the promoter region (TSS to +200)  
349 and a significant H3K9ac TSS peak (q-value <0.05). Out of 15,768 such active protein  
350 coding transcription units, we found 1,302 where initiation was inhibited after 2h A-485  
351 treatment (<50% the GRO-seq counts in the promoter region compared to control  
352 DMSO-treated cells), and 993 (6.3%) with defective pause-release after A-485  
353 treatment (>2-fold increase in PI) (Figure 5b). 238 assessed transcription units passed  
354 the criteria for both groups, indicating that both transcription initiation and promoter-  
355 proximal pause release were reduced by A-485 treatment (Figure 5b).

356

357 *A-485 sensitive Pol2 pause-release and SEC recruitment at genes with A-485-induced*  
358 *hypoaacetylation at TSSs*

359 First, we consider the 993 protein coding transcription units in which promoter-proximal  
360 pause-release was inhibited by A-485 treatment and the resulting loss of H3K18/27ac in  
361 their promoter regions. Protein coding transcription units where A-485 treatment caused  
362 >2-fold increase in PI are referred to as “2XPI genes.” We plotted the average H3K18,

363 K27, and K9 acetylation ChIP-seq counts near the TSS for all genes and for 2XPI genes  
364 (Figure 6a). H3K18ac and K27ac at TSSs for 2XPI genes decreased in response to A-  
365 485, as expected for a specific competitive inhibitor of the CBP/p300 acetyl-transferase.  
366 But this was in contrast to the surprising *increase* in H3K18 and K27 acetylation on  
367 average at the TSSs for all genes in response to A-485. Thus H3K18/27 acetylation in  
368 the promoter regions of 2XPI genes was particularly sensitive to CBP/p300 inhibition;  
369 whereas, the average H3K18/27 acetylation in the promoter regions for all genes was  
370 increased by treatment with A-485 (Figure 6a). H3K9ac, did not change at the TSS in A-  
371 485-treated cells in the average plot for all genes, and decreased modestly at TSSs of  
372 2XPI genes after A-485 treatment (Figure 6a).

373 To determine if these decreases in H3 acetylation at 2XPI genes were correlated  
374 with decreased SEC component binding, we plotted AF9 and ENL ChIP-seq counts for  
375 all genes and for 2XPI genes after A-485 treatment (Figure 6b). Remarkably, AF9 and  
376 ENL were highly enriched at TSSs and gene bodies of 2XPI genes. Further, after A-485  
377 treatment, AF9 and ENL association with 2XPI genes fell to the average level for all  
378 genes. Thus, genes with an increase in PI after A-485 treatment were very highly  
379 enriched for association of SEC complexes throughout their transcription units. BRD4  
380 association near the TSS of 2XPI genes was reduced by A-485 (Figure 6c) but to a far  
381 less extent than AF9 and ENL reduction (Figure 6b).

382

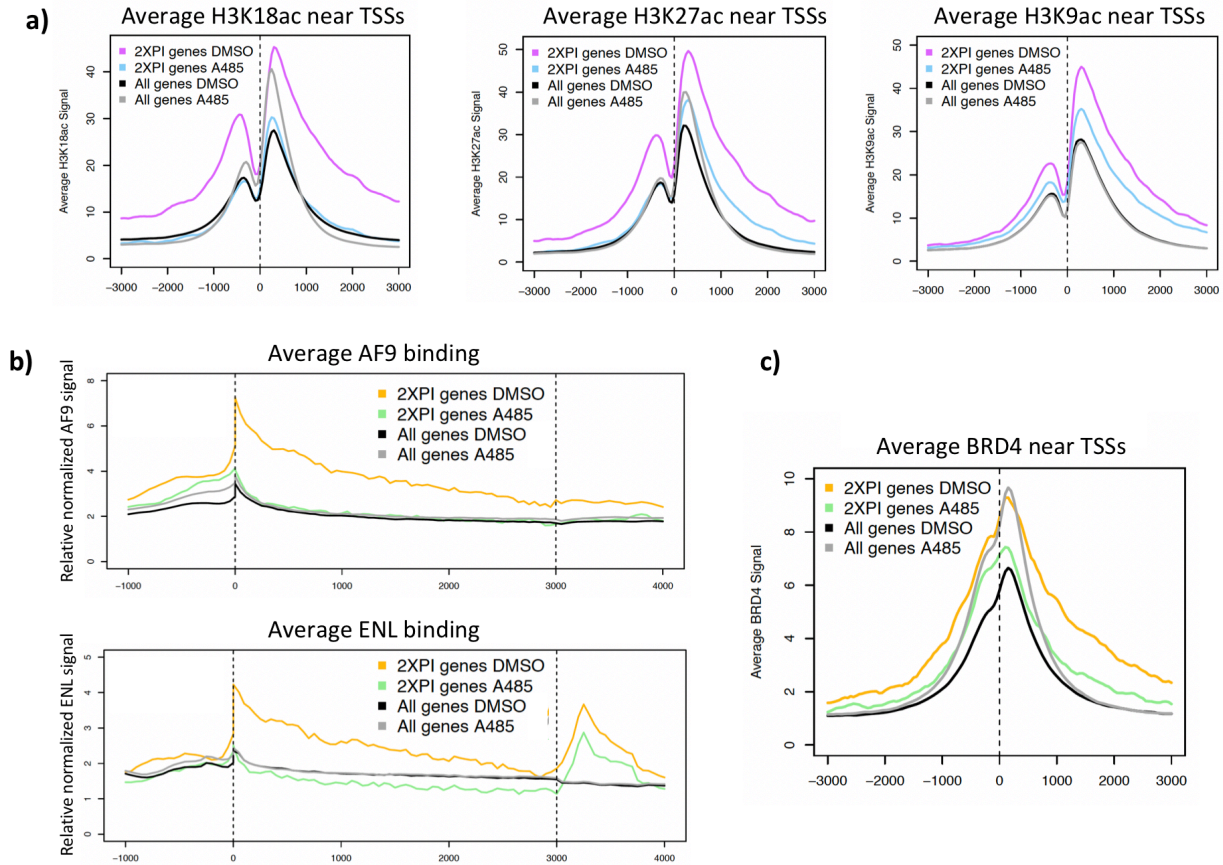

383

384 **Figure 6: Decreased average H3 acetylation and SEC binding at 2XPI genes**

385 (a) Average H3K18ac, H3K27ac, and H3K9ac near TSSs in all genes and 2XPI genes  
386 after DMSO or A-485 treatment.

387 (b) Average AF9 and ENL across all genes and 2XPI genes after DMSO or A-485  
388 treatment.

389 (c) Average BRD4 near TSSs in all genes and 2XPI genes after DMSO or A-485  
390 treatment.

391

392 *H3K9ac is sufficient for BRD4 enhancer binding which stimulates pause release at*

393 *nearby genes*

394 It was evident that BRD4 peaks were enriched at enhancers. 56% of identified BRD4  
395 peaks (14,877 out of 26,534 (see Methods)) were >2.5kb from the nearest TSS in  
396 control cells treated with DMSO. Of these distal peaks, 84% overlapped with peaks of  
397 H3K27ac, indicating that these peaks were primarily at enhancers. We subsequently  
398 clustered all enhancers associated with BRD4 based on whether or not BRD4  
399 association decreased to <50% of DMSO control after A-485 treatment for 2h. There  
400 were 7,554 peaks where BRD4 decreased to <50% of control after A-485 treatment  
401 (referred to as “A-485 sensitive” enhancers; Figure 7a bottom) and 6,324 peaks where  
402 BRD4 association remained unaltered or was not reduced to <50% of control (“A-485  
403 resistant”; Figure 7a, top). As shown in Figure 7a, decreased BRD4 binding after A-485  
404 treatment correlated with decreased H3K9ac. When BRD4 binding was unaffected or  
405 modestly affected by A-485 treatment, the decrease in H3K9ac was minimal. These  
406 observations suggest that acetylation at H3K9 is sufficient for BRD4 association at  
407 enhancers.  
408

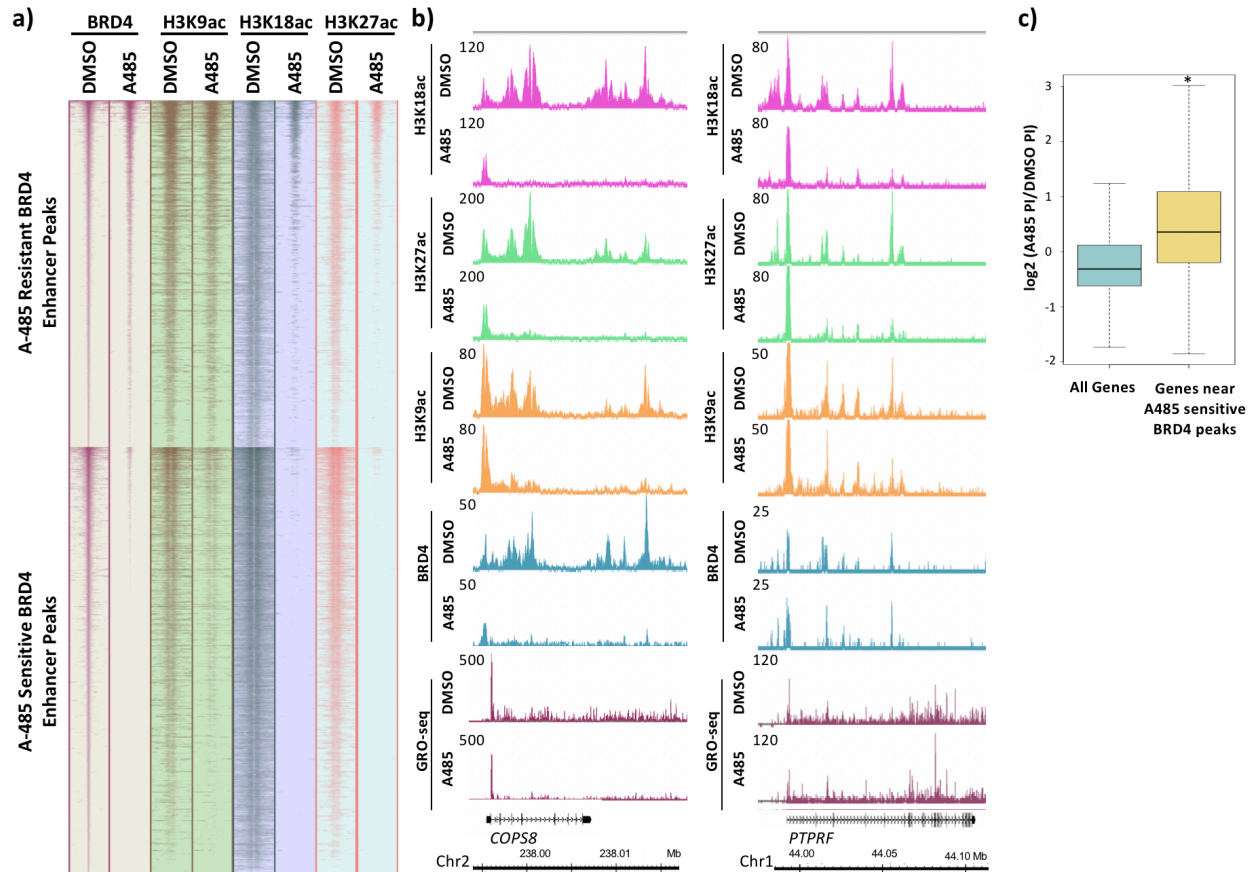

409

410 **Figure 7: BRD4 enhancer binding stimulates pause-release at nearby genes**

411 (a) Heatmaps of BRD4, H3K9ac, H3K18ac, and H3K27ac ChIP-seq data. BRD4

412 enhancer peaks are divided into those which are A-485 resistant (top cluster) or A-485

413 sensitive (bottom cluster).

414 (b) Gene browser plots of ChIP-seq data for the indicated histone modifications and

415 BRD4, and GRO-seq counts for regions including the *COPS8* (left), and *PTPRF* (right)

416 genes.

417 (c) Boxplots comparing the change in PI after A-485 treatment ( $\log_2(\text{A-485 PI}/\text{DMSO}$

418  $\text{PI})$ ) for all genes vs. genes near A-485 sensitive enhancer BRD4 peaks.

419

420 We next asked if BRD4 enhancer association correlated with the extent of Pol2  
421 pause-release in the promoter proximal region of nearby genes. For example, *COPS8* is  
422 a gene with downstream proximal enhancers that have A-485-sensitive BRD4  
423 association (Figure 7b). At these enhancers there was decreased H3K18/27ac,  
424 H3K9ac, and BRD4 in A485-treated cells (Figure 7b). This correlated with only a  
425 modest decrease in the GRO-seq reads at the Pol2 pause site (~30%, Figure 7b), and  
426 therefore, an ~30% decrease in the amount of Pol2 that had initiated transcription at the  
427 *COPS8* TSS in this population of cells, compared to control DMSO-treated cells. But A-  
428 485 caused a larger decrease in GRO-seq reads downstream from the *COPS8*  
429 promoter-proximal pause site (Figures 7b,S2). *NDRG1* is an example of another gene  
430 proximal to enhancers with A-485-sensitive BRD4 association. Similar to *COPS8*, A-485  
431 treatment caused a decrease in release of promoter-proximal paused Pol2, but little  
432 decrease in Pol2 initiation near the pause site (Figure S3). These results indicate that A-  
433 485 inhibits *COPS8* and *NDRG1* transcription primarily during the release of Pol2 from  
434 the major promoter-proximal pause site.

435 In contrast to *COPS8* and *NDRG1*, *PTPRF* is a gene with A-485-resistant BRD4  
436 association at nearby enhancer regions in its introns (Figure 7b). A-485 treatment  
437 reduced H3K18/27ac but not H3K9ac or BRD4 association at these enhancers. This  
438 correlated with only a modest decrease in the GRO-seq reads at the Pol2 pause site (to  
439 ~70% the level in control DMSO-treated cells, Figure 7b), and therefore, an ~30%  
440 decrease in the amount of Pol2 that had initiated transcription at the *COPS8* TSS in this  
441 population of cells, compared to control DMSO-treated cells. These results indicate that  
442 *PTPRF* is not regulated by H3K18/27ac during elongation, and instead suggest that



443 H3K18/27ac primarily regulates transcription initiation of the *PTPRF* gene. Similarly,  
444 *PAG1*, encoding a transmembrane adaptor protein that organizes membrane-proximal  
445 signaling complexes in lipid rafts, is another example of a gene that showed A-485  
446 inhibition of Pol2 pause release in the promoter proximal region (Figure S4). Thus,  
447 *PTPRF* and *PAG1* appear to be regulated by promoter-proximal H3K18/27ac  
448 stimulation of promoter-proximal pause release, similarly to the HAdV-5 E4 promoter  
449 (Figure 1a, bottom). Alternatively, *CSF3* is an example of a gene where promoter region  
450 H3K18/27 hypoacetylation greatly inhibited Pol2 initiation (Figure S5), as for the HAdV-5  
451 E2early promoter. *TRIB1* (Figure S6) is an example of a gene where A-485 and the  
452 resulting promoter region H3K18/27 hypoacetylation inhibited both initiation (to ~50%  
453 the level in control DMSO-treated cells) and elongation passed the pause site.

454 Comparing the *COPS8* and *PTPRF* genes, the major difference in H3 acetylation  
455 in response to A-485 was at H3K9 in their associated enhancers (Figure 7b). H3K9ac of  
456 the *PTPRF* intronic enhancer regions was only minimally reduced by A-485 treatment  
457 and correlated with A-485-resistant BRD4 association with the intronic enhancer (Figure  
458 7b). Whereas at the *COPS8* and *NDRG1* genes, A-485 treatment inhibited H3K9ac at  
459 the downstream enhancers, and this loss of enhancer H3K9ac correlated with reduced  
460 BRD4 association with these enhancers (Figure 7b, S3). Reduced BRD4 association  
461 with these intronic enhancers of *COPS8* and *NDRG1* correlated with decreased pause  
462 release from their promoter-proximal pause sites after treatment with A-485 (Figure 7b).  
463 This correlation between A-485-sensitive BRD4-enhancer association and efficient Pol2  
464 pause-release in the promoter-proximal region was observed broadly. When we  
465 compared the difference in PIs after A-485 treatment, we observed a significant

466 increase in PI distribution for genes near A-485-sensitive enhancer BRD4 peaks  
467 compared to all genes (Figure 7c).

468

## 469 **Discussion**

470 There is a substantial base of knowledge establishing a correlation between histone N-  
471 terminal tail lysine acetylation and transcriptional activity. However, understanding of the  
472 mechanisms underlying this correlation remains incomplete. In addition to regulating  
473 PIC assembly and Pol2 initiation, our results support a mechanism by which histone H3  
474 N-terminal tail acetylation in the promoter-proximal region regulates Pol2 release from  
475 promoter-proximal pause-sites in a subset of adenovirus and primary human airway  
476 epithelial cell promoters.

477

### 478 **H3K18/27ac by CBP/p300 stimulates BRD4 and SEC-association and promoter- 479 proximal Pol2 pause-release.**

480 Initially we observed that super-elongation complex (SEC) recruitment through  
481 association with promoter region histone H3 acetylated at K18 and K27 stimulates  
482 paused Pol2 release at the HAdV-5 E4 promoter (Figure 1a). To do this study, we used  
483 a multi-site E1A mutant (DM-E1A) defective for binding CBP/p300 by the E1A activation  
484 domain (19), and defective for stimulating promoter H3K18/27ac at viral early promoters  
485 (19). GRO-seq studies following infection of primary airway epithelial cells with Ad5  
486 vectors expressing wt or DM-E1A revealed that the E4 pausing index increased when  
487 the DM-E1A failed to stimulate H3K18/27ac at the E4 promoter. This result suggests  
488 that promoter H3K18/27ac contributes to paused Pol2 release at the E4 promoter.

489           We observed a correlation between defective paused Pol2-release at the viral E4  
490 promoter and decreased association of SEC subunits CDK9, AF9, and ENL, indicating  
491 that H3K18/27ac is necessary for maximal SEC recruitment and Pol2 pause-release in  
492 the E4 promoter region. This is similar to a proposed function of H3K9ac as a binding  
493 site for AF9 and ENL, thereby promoting paused Pol2 release by directly recruiting the  
494 SEC (15). SEC recruitment at E4 by H3K18/27ac may be due to interactions with  
495 acetyl-lysine-binding YEATS domains present in the AF9 and ENL SEC subunits (14,  
496 15), but other SEC components may also contribute. For example, the SEC was  
497 reported to be recruited to chromatin with H3K27ac through an interaction with the C-  
498 terminus of the central scaffold protein AFF4 at the TSS of the estrogen receptor 1 gene  
499 (*ESR1*) in cultured breast cancer cells (33).

500           Defective pause-release and decreased SEC recruitment at E4 also were  
501 observed in wt E1A-expressing cells when CBP/p300 acetyl-transferase activity was  
502 inhibited by the competitive inhibitor A-485 (19) (Figure 4A). These results indicate that  
503 CBP/p300 HAT activity is necessary for maximal promoter-proximal paused Pol2  
504 release at E4. However, these data do not rule out the possibility that other factors that  
505 associate with H3K18/27ac also contribute to Pol2 pause-release at E4. For example,  
506 BRD proteins have several BRD domains, some of which bind acetylated lysines with  
507 moderate affinity, potentially participating in cooperative protein binding to a region of  
508 chromatin with multiple acetylated lysines (29, 34, 35). Additionally, the Mediator  
509 complex subunit MED26 is known to recruit the SEC after dissociation of the mediator  
510 from TFIID (36, 37). Therefore, it is also possible that additional consequences of  
511 promoter proximal H3K18/27 hypoacetylation, such as reduced association with

512 MED26-containing mediator complexes, also contribute to decreased Pol2 promoter-  
513 proximal pause release at E4 after activation by DM-E1A.

514

515 **A consensus TATA-box overcomes transcription inhibition by promoter H3K18/27**  
516 **hypoacetylation**

517 It is interesting to note that the sensitivity of HAdV-5 early region transcription to  
518 promoter H3K18/27 hypoacetylation correlated with the similarity between their TATA-  
519 box sequences and the consensus TATA-box sequence. This likely results in higher  
520 affinity of TBP for the TATA-boxes of the genes resistant to H3K18/27 hypoacetylation,  
521 than for the sensitive genes. E3 transcription is the most resistant of the HAdV-5 early  
522 regions to promoter hypoacetylation (19). The E3 TATA-box is a good match to the  
523 consensus TATA-box sequence TATA[A/T]A[A/T][A/G]. It's sequence,  
524 **cgTATAACTC**ac (central eight base pairs contacted directly by human TBP (38) shown  
525 capitalized, and matches to the TATA-box consensus sequence shown bold). The  
526 match to the consensus TATA-box is particularly good in the 5'-half of the TATA-box  
527 which makes more contacts with TBP than the 3'-half of the TATA-box and is more  
528 highly conserved than the 3'-half (38). In contrast, E2early is the most sensitive early  
529 region to promoter H3K18/27 hypoacetylation (19), and it's TATA-box  
530 (cc**TTAAGAGT**ca) has the lowest match to the consensus TATA-box. This probably  
531 results in a lower affinity of TBP for the E2early compared to the E3 TATA-box.  
532 Promoter H3K18/27 hypoacetylation at the E2early promoter in response to A-485  
533 treatment greatly inhibited transcription initiation as indicated by the decrease in GRO-  
534 seq counts at the E2early TSS and gene body (Figure 4a).

535           The HAdV-5 E4 promoter has a symmetrical TATA-box (cc**TATATATA**ct) (39)  
536 that is a perfect match to the consensus TATA-box in the eight base pairs that interact  
537 directly with human TBP (38). Again, GRO-seq showed that despite E4 promoter  
538 H3K18/27 hypoacetylation (Figure 1a), there was little if any defect in Pol2 initiation and  
539 elongation to the promoter-proximal pause site (Figures 1a highlighted and 2a). Thus,  
540 compared to the E2early promoter with a non-consensus TATA-box, promoter  
541 H3K18/27 hypoacetylation had a much smaller effect on transcription initiation at the E3  
542 and E4 promoters with consensus TATA-boxes that are probably bound by TBP with  
543 higher affinity than the E2early TATA-box.

544           The principle effect of E4 promoter H3K18/27 hypoacetylation was on promoter-  
545 proximal pause release, causing a decrease in transcribing Pol2 downstream from the  
546 promoter revealed by low GRO-seq counts in the gene body (Figure 1a). This correlated  
547 with lower BRD4, CDK9 and SEC subunit association throughout the gene body after  
548 activation by DM-E1A compared to wt E1A (Figure 2b).

549

550 **A subset of cellular promoters requires H3K18/27 acetylation by CBP/p300 for**  
551 **maximal promoter-proximal Pol2-release.**

552 Analysis of the ChIP-seq and GRO-seq data for cellular chromatin from cells treated  
553 with A-485 established that regulation of Pol2 pause-release and SEC recruitment by  
554 promoter region H3K18/27ac also occurs at a small fraction of cellular promoters. With  
555 A-485 treatment, we observed the expected decreases in H3K18/27ac at enhancers,  
556 along with an intriguing increase in the average H3K18/27ac at TSSs of all genes. This  
557 indicates that the dynamics of HAT and/or HDAC activities in response to A-485 differs

558 at promoters versus enhancers. A-485 also resulted in defects in pause-release at ~6%  
559 of active promoters in primary respiratory epithelial cells. These promoters are similar in  
560 that promoter region acetylation was decreased after A-485 treatment, as opposed to  
561 the increase in average promoter H3K18/27ac at all genes (Figure 6a).

562

### 563 **Higher rate of H3K18/27 acetylation at promoters compared to enhancers.**

564 The steady-state level of H3K18/27ac on any specific nucleosome is determined  
565 by the relative rates of its acetylation and de-acetylation (30, 40). A-485 inhibits  
566 CBP/p300 acetyl transferase activity by competing with acetyl-CoA for binding to the  
567 enzyme's active site (20). No evidence for inhibition of a histone deacetylase by A-485  
568 was detected (20), and is very unlikely given the highly specific interactions of A-485  
569 with the CBP acetyl-transferase domain (20). Consequently, since it seems unlikely that  
570 A-485 directly increases the rate of H3 deacetylation, the decrease in average enhancer  
571 H3K18/27ac in A-485 treated cells to one-third the level in control DMSO-treated cells  
572 (Figure 5a) suggests that the rate of H3K18/27 acetylation at enhancers in cells treated  
573 with A-485 for 2h or more (Figure 3a) was reduced to one-third of the normal rate in  
574 control DMSO-treated cells.

575 In striking contrast to this expected decrease in H3K18/27ac at enhancers, at  
576 promoters the average H3K18/27ac increased during treatment with this specific  
577 inhibitor of the CBP/p300 acetyl-transferase activity. This result indicates that the rate of  
578 H3K18/27 acetylation at promoters is ~4 to 5-fold higher than at enhancers. These  
579 results also suggest that there is an uncharacterized homeostatic mechanism that  
580 maintains promoter region H3K18/27ac in the face of extensive inhibition of the known

581 lysine acetyl transferases that acetylate these sites, the closely related CBP and p300  
582 (18). It is possible that the difference in the effects of A-485 on the rates of promoter  
583 versus enhancer acetylation by CBP/p300 is due to differences in nucleosome density  
584 or the density of other proteins at promoters versus enhancers that restrict the diffusion  
585 of the 536 Da drug molecule to the CBP/p300 active site. However, it seems unlikely  
586 that diffusion of A-485 molecules would be greatly restricted by nucleosomes that are  
587 ~400 times larger than the drug and irregularly packed into disordered chains of “beads  
588 on a string” nucleosomes with different particle and linker DNA arrangements in  
589 interphase nuclei (41). Consequently, the resistance of H3K18/27ac at TSSs to A-485 in  
590 living cells probably results from an ~four to five-fold faster rate of H3K18/27 acetylation  
591 by CBP/p300 at promoters than at enhancers and most other locations in the genome,  
592 on average. This is the result expected if transient interactions between the activation  
593 domains of activators bound to their cognate DNA-binding sites in enhancers increase  
594 the local concentration of CBP/p300 in promoter regions.

595 BRD4 contains two bromodomains that bind acetylated lysines (42, 43). The C-  
596 terminal portion of BRD4 binds P-TEFb and is thought to recruit it to hyperacetylated  
597 genomic regions to stimulate elongation (22). BRD4 has been shown to associate with  
598 promoters and enhancers and to act as a histone chaperone to facilitate elongation of  
599 both protein coding and enhancer RNAs (10). By clustering BRD4 enhancer peaks into  
600 A-485-sensitive and -resistant groups and correlating these data with H3K9ac and  
601 H3K18/27ac association, we conclude that H3K9ac is sufficient for BRD4 recruitment at  
602 enhancers in the absence of H3K18/27ac. Additionally, GRO-seq in cells treated with A-  
603 485 revealed a correlation between decreased BRD4 enhancer association and

604 defective release of paused pol2 from nearby promoters. The mechanism by which this  
605 occurs is likely through direct promoter-enhancer interactions facilitated by long-range  
606 chromatin interactions (36). Another possibility is that transcription of enhancer RNAs  
607 (eRNAs) stimulated by BRD4 stimulates paused Pol2 release by promoting NELF  
608 release (44).

609         Our results suggest a model in which histone H3 acetylation is essential for  
610 maximal paused Pol2 release at the HAdV-5 E4 promoter. By analyzing H3 acetylation,  
611 SEC subunit chromatin association, and pol2 pausing on the human genome, we  
612 establish that this is mechanism that applies to ~1000 active human promoters in  
613 primary airway epithelial cells. Additionally, the identification of BRD4 enhancer peaks  
614 that were either sensitive or resistant to A-485 treatment presented an opportunity to  
615 study the effects of elongation factor association with enhancers, on elongation.  
616 Interestingly, we found that H3K9ac is sufficient for BRD4 binding at enhancers and that  
617 BRD4 enhancer binding is correlated with decreased Pol2 pausing and increased  
618 productive elongation. Taken together, our results draw interesting causal links between  
619 histone H3 acetylation and regulation of Pol2 elongation as well as initiation.

620

621



## 622 **Materials and Methods**

623

### 624 **Ad5 mutant vectors**

625 Ad5 mutant vectors expressing wt E1A and DM E1A were constructed as previously  
626 described (19).

627

### 628 **Cell culture**

629 Human bronchial/tracheal epithelial cells (HBTEC; catalog number FC-0035, lot number  
630 02196; Lifeline Cell Technology) were grown at 37°C in a BronchiaLife medium  
631 complete kit (LL-0023; Lifeline Cell Technology) in a 5% CO<sub>2</sub> incubator until they  
632 reached confluence. Cells were then incubated 3 days more without addition of fresh  
633 medium and were infected for 12 hours with the indicated HAdV-5 mutants in the  
634 conditioned medium. A-485 (MedChemExpress) was added to a final concentration of  
635 10 µM, or the same volume of DMSO vehicle was added, and cells were incubated for  
636 an additional 2 h.

637

### 638 **GRO-seq**

639 Cells were harvested and incubated in swelling buffer (10 µM Tris-HCl, 2 mM MgCl<sub>2</sub>, 3  
640 mM CaCl<sub>2</sub>). Nuclei were isolated with lysis buffer (10 µM Tris-HCl, 2 mM MgCl<sub>2</sub>, 3 mM  
641 CaCl<sub>2</sub>, 10% glycerol, 1% NP-40). Nuclear run-on was performed at 30°C for 7 min in 10  
642 mM Tris-HCl pH 8, 5 mM MgCl<sub>2</sub>, 300 mM KCl, 1 mM DTT, 500 µM ATP, 500 µM GTP,  
643 500 µM Br-UTP, 2 µM CTP, 200 U/ml Superase In RNase Inhibitor (Invitrogen), and 1%  
644 Sarkosyl. Nuclear RNA was isolated with Trizol (Invitrogen). DNase treatment was

645 performed with Turbo DNA-free kit (Invitrogen). RNA was purified with Micro Bio-Spin P-  
646 30 Gel Columns (Bio-Rad), fragmented with RNA Fragmentation Kit (Invitrogen), and  
647 treated with 10 units RppH (NEB) and 30 units T4 PNK (NEB). RNA  
648 immunoprecipitation was performed with Anti-BrU-conjugated agarose beads (Santa  
649 Cruz Biotechnologies). Library preparation was performed with TruSeq Small RNA  
650 Library Preparation Kit (Illumina). GRO-seq reads were aligned with HISTAT2 software  
651 to Ad5 and human (hg19) genomes and normalized to the number of reads aligned to  
652 hg19. Pause indexes (TSS to +200 counts)/(+201 to TTS counts) were calculated using  
653 HTSeq software.

654

#### 655 **qRT-PCR**

656 Total RNA extracted from HTBECs using a PureLink RNA minikit (Ambion) was reverse  
657 transcribed with random hexamer priming using Superscript III (Invitrogen). RNA was  
658 treated with DNase I with Turbo DNA-free kit (Ambion). Quantitative reverse  
659 transcription-PCRs (qRT-PCRs) were carried out with the Applied Biosystems 7500  
660 real-time PCR system with FastStart universal SYBR green master mix (Roche). All  
661 values were normalized to 18S RNA levels.

662

#### 663 **ChIP-seq**

664 Preparation of cross-linked HBTEC chromatin, sonication, and immunoprecipitation was  
665 as described in reference (32). Sequencing libraries were constructed from 1 ng of  
666 immunoprecipitated and input DNA using the KAPA Hyper Prep kit (KAPA Biosystems)  
667 and NEXTflex ChIP-seq barcodes (Bio Scientific).

668

## 669 **Data Analysis of ChIP-seq**

670 ChIP-seq libraries were sequenced using HiSeq 4000 or NovaSeq 6000. For analysis  
671 on the Ad5 genome, sequence tags were aligned using Bowtie2 software and  
672 normalized to the following formula: (number of Ad5-aligned reads in the input  
673 sample/number of human-aligned reads in the input sample) × (number of Ad5-aligned  
674 reads in the ChIP sample). For analysis on the human genome, reads were mapped to  
675 the hg19 human genome reference using Bowtie2 software. Only reads that aligned to a  
676 unique position in the genome with no more than two sequence mismatches were  
677 retained for further analysis. Duplicate reads that mapped to the same exact location in  
678 the genome were counted only once to reduce clonal amplification effects. MACS2  
679 software was used for peak calling (q-value < 0.05 were considered significant). The  
680 total counts of the input and ChIP samples were normalized to each other. Samples  
681 were normalized for equal number of uniquely mapped reads. The input sample was  
682 used to estimate the expected counts in a window. Wiggle files were generated using a  
683 custom algorithm and present the data as normalized tag density as seen in all figures  
684 with genome browser shots. Metagene plots displaying normalized average relative  
685 ChIP-seq signals were generated using CEAS software.

686

## 687 **Antibodies**

688 Antibodies included H3K18ac (814), prepared and validated as described previously  
689 (45), H3K9ac (07-352; Millipore), H3K27ac (39133; Active Motif), H3 (ab10799, Abcam),  
690 AF9 (GTX102835, Genetex), BRD4 (A301-985A50), NELF TH1L D5G6W (12265S, Cell

691 Signaling), Pol2 Ser2-P 31Z3G (13499, Cell Signaling), Pol2 Ser5-P D9N5I (13523, Cell  
692 Signaling) , and CDK9 C12F7 (2316, Cell Signaling).

693

## 694 **References**

- 695 1. Core LJ, Waterfall JJ, Lis JT. 2008. Nascent RNA sequencing reveals widespread  
696 pausing and divergent initiation at human promoters. *Science* (80- ) 322:1845–  
697 1848.
- 698 2. Seila AC, Calabrese JM, Levine SS, Yeo GW, Rahl PB, Flynn RA, Young RA,  
699 Sharp PA. 2008. Divergent transcription from active promoters. *Science*  
700 322:1849–1851.
- 701 3. Core L, Adelman K. 2019. Promoter-proximal pausing of RNA polymerase II: a  
702 nexus of gene regulation. *Genes Dev* 33:960–982.
- 703 4. Nogales E, Louder RK, He Y. 2017. Structural Insights into the Eukaryotic  
704 Transcription Initiation Machinery. *Annu Rev Biophys* 46:59–83.
- 705 5. Sainsbury S, Bernecky C, Cramer P. 2015. Structural basis of transcription  
706 initiation by RNA polymerase II. *Nat Rev Mol Cell Biol* 16:129–143.
- 707 6. Cramer P. 2019. Organization and regulation of gene transcription. *Nature*  
708 573:45–54.
- 709 7. Jonkers I, Lis JT. 2015. Getting up to speed with transcription elongation by RNA  
710 polymerase II. *Nat Rev Mol Cell Biol*.
- 711 8. Adelman K, Lis JT. 2012. Promoter-proximal pausing of RNA polymerase II:  
712 emerging roles in metazoans. *Nat Rev Genet* 13:720–731.
- 713 9. Vos SM, Farnung L, Urlaub H, Cramer P. 2018. Structure of paused transcription

- 714 complex Pol II–DSIF–NELF. *Nature* 560:601–606.
- 715 10. Kanno T, Kanno Y, Leroy G, Campos E, Sun HW, Brooks SR, Vahedi G,  
716 Heightman TD, Garcia BA, Reinberg D, Siebenlist U, O’Shea JJ, Ozato K. 2014.  
717 BRD4 assists elongation of both coding and enhancer RNAs by interacting with  
718 acetylated histones. *Nat Struct Mol Biol* 21:1047–1057.
- 719 11. Boija A, Mahat DB, Zare A, Holmqvist PH, Philip P, Meyers DJ, Cole PA, Lis JT,  
720 Stenberg P, Mannervik M. 2017. CBP Regulates Recruitment and Release of  
721 Promoter-Proximal RNA Polymerase II. *Mol Cell* 68:491–503.e5.
- 722 12. Pathak R, Singh P, Ananthakrishnan S, Adamczyk S, Schimmel O, Govind CK.  
723 2018. Acetylation-Dependent Recruitment of the FACT Complex and Its Role in  
724 Regulating Pol II Occupancy Genome-Wide in *Saccharomyces cerevisiae*.  
725 *Genetics* genetics.300943.2018.
- 726 13. Luo Z, Lin C, Shilatifard A. 2012. The super elongation complex (SEC) family in  
727 transcriptional control. *Nat Rev Mol Cell Biol* 13:543–547.
- 728 14. Li Y, Wen H, Xi Y, Tanaka K, Wang H, Peng D, Ren Y, Jin Q, Dent SYR, Li W, Li  
729 H, Shi X. 2014. AF9 YEATS domain links histone acetylation to DOT1L-mediated  
730 H3K79 methylation. *Cell* 159:558–571.
- 731 15. Gates LA, Shi J, Rohira AD, Feng Q, Zhu B, Bedford MT, Sagum CA, Jung SY,  
732 Qin J, Tsai MJ, Tsai SY, Li W, Foulds CE, O’Malley BW. 2017. Acetylation on  
733 histone H3 lysine 9 mediates a switch from transcription initiation to elongation. *J*  
734 *Biol Chem* 292:14456–14472.
- 735 16. He N, Chan CK, Sobhian B, Chou S, Xue Y, Liu M, Alber T, Benkirane M, Zhou  
736 Q. 2011. Human Polymerase-Associated Factor complex (PAFc) connects the

- 737 Super Elongation Complex (SEC) to RNA polymerase II on chromatin. *Proc Natl*  
738 *Acad Sci U S A* 108.
- 739 17. Huff JT, Plocik AM, Guthrie C, Yamamoto KR. 2010. Reciprocal intronic and  
740 exonic histone modification regions in humans. *Nat Struct Mol Biol* 17:1495–1499.
- 741 18. Jin Q, Yu L-R, Wang L, Zhang Z, Kasper LH, Lee J-E, Wang C, Brindle PK, Dent  
742 SYR, Ge K. 2011. Distinct roles of GCN5/PCAF-mediated H3K9ac and  
743 CBP/p300-mediated H3K18/27ac in nuclear receptor transactivation. *EMBO J*  
744 30:249–62.
- 745 19. Hsu E, Pennella MA, Zemke NR, Eng C, Berk AJ. 2018. Adenovirus E1A  
746 Activation Domain Regulates H3 Acetylation Affecting Varied Steps in  
747 Transcription at Different Viral Promoters. *J Virol* 92.
- 748 20. Lasko LM, Jakob CG, Edalji RP, Qiu W, Montgomery D, Digiammarino EL,  
749 Hansen TM, Risi RM, Frey R, Manaves V, Shaw B, Algire M, Hessler P, Lam LT,  
750 Uziel T, Faivre E, Ferguson D, Buchanan FG, Martin RL, Torrent M, Chiang GG,  
751 Karukurichi K, Langston JW, Weinert BT, Choudhary C, de Vries P, Van Drie JH,  
752 McElligott D, Kesicki E, Marmorstein R, Sun C, Cole PA, Rosenberg SH,  
753 Michaelides MR, Lai A, Bromberg KD. 2017. Discovery of a selective catalytic  
754 p300/CBP inhibitor that targets lineage-specific tumours. *Nature* 2017/09/27.  
755 550:128–132.
- 756 21. Rahl PB, Lin CY, Seila AC, Flynn RA, McCuine S, Burge CB, Sharp PA, Young  
757 RA. 2010. c-Myc regulates transcriptional pause release. *Cell* 141:432–445.
- 758 22. Buratowski S. 2009. Progression through the RNA polymerase II CTD cycle. *Mol*  
759 *Cell* 36:541–546.

- 760 23. Jonkers I, Kwak H, Lis JT. 2014. Genome-wide dynamics of Pol II elongation and  
761 its interplay with promoter proximal pausing, chromatin, and exons. *Elife*  
762 3:e02407.
- 763 24. Martin RM, Rino J, Carvalho C, Kirchhausen T, Carmo-Fonseca M. 2013. Live-  
764 cell visualization of pre-mRNA splicing with single-molecule sensitivity. *Cell Rep*  
765 4:1144–1155.
- 766 25. Nguyen VT, Kiss T, Michels AA, Bensaude O. 2001. 7SK small nuclear RNA  
767 binds to and inhibits the activity of CDK9/cyclin T complexes. *Nature* 414:322–  
768 325.
- 769 26. Yang Z, Zhu Q, Luo K, Zhou Q. 2001. The 7SK small nuclear RNA inhibits the  
770 CDK9/cyclin T1 kinase to control transcription. *Nature* 414:317–322.
- 771 27. Li Q, Price JP, Byers SA, Cheng D, Peng J, Price DH. 2005. Analysis of the large  
772 inactive P-TEFb complex indicates that it contains one 7SK molecule, a dimer of  
773 HEXIM1 or HEXIM2, and two P-TEFb molecules containing Cdk9 phosphorylated  
774 at threonine 186. *J Biol Chem* 280:28819–28826.
- 775 28. Chen FX, Smith ER, Shilatifard A. 2018. Born to run: control of transcription  
776 elongation by RNA polymerase II. *Nat Rev Mol Cell Biol* 19:464–478.
- 777 29. Jang MK, Mochizuki K, Zhou M, Jeong H-S, Brady JN, Ozato K. 2005. The  
778 bromodomain protein Brd4 is a positive regulatory component of P-TEFb and  
779 stimulates RNA polymerase II-dependent transcription. *Mol Cell* 19:523–534.
- 780 30. Weinert BT, Narita T, Satpathy S, Srinivasan B, Hansen BK, Schölz C, Hamilton  
781 WB, Zucconi BE, Wang WW, Liu WR, Brickman JM, Kesicki EA, Lai A, Bromberg  
782 KD, Cole PA, Choudhary C. 2018. Time-Resolved Analysis Reveals Rapid

- 783 Dynamics and Broad Scope of the CBP/p300 Acetylome. *Cell* 2018/05/24.  
784 174:231–244.e12.
- 785 31. Horwitz GA, Zhang K, McBrien MA, Grunstein M, Kurdistani SK, Berk AJ. 2008.  
786 Adenovirus small e1a alters global patterns of histone modification. *Science* (80- )  
787 321:1084–1085.
- 788 32. Ferrari R, Gou D, Jawdekar G, Johnson SA, Nava M, Su T, Yousef AF, Zemke  
789 NR, Pellegrini M, Kurdistani SK, Berk AJ. 2014. Adenovirus small E1A employs  
790 the lysine acetylases p300/CBP and tumor suppressor RB to repress select host  
791 genes and promote productive virus infection. *Cell Host Microbe* 16:663–676.
- 792 33. Gao Y, Chen L, Han Y, Wu F, Yang W-S, Zhang Z, Huo T, Zhu Y, Yu C, Kim H,  
793 Lee M, Tang Z, Phillips K, He B, Jung SY, Song Y, Zhu B, Xu R-M, Feng Q. 2020.  
794 Acetylation of histone H3K27 signals the transcriptional elongation for estrogen  
795 receptor alpha. *Commun Biol* 3:165.
- 796 34. Dhalluin C, Carlson JE, Zeng L, He C, Aggarwal AK, Zhou M-M, Zhou M-M. 1999.  
797 Structure and ligand of a histone acetyltransferase bromodomain. *Nature*  
798 399:491–496.
- 799 35. Ozato K, Shin D-M, Chang T-H, Morse HC. 2008. TRIM family proteins and their  
800 emerging roles in innate immunity. *Nat Rev Immunol* 8:849–860.
- 801 36. Takahashi H, Parmely TJ, Sato S, Tomomori-Sato C, Banks CAS, Kong SE,  
802 Szutorisz H, Swanson SK, Martin-Brown S, Washburn MP, Florens L, Seidel CW,  
803 Lin C, Smith ER, Shilatifard A, Conaway RC, Conaway JW. 2011. Human  
804 mediator subunit MED26 functions as a docking site for transcription elongation  
805 factors. *Cell* 146:92–104.



- 806 37. Vijayalingam S, Chinnadurai G. 2013. Adenovirus L-E1A activates transcription  
807 through mediator complex-dependent recruitment of the super elongation  
808 complex. *J Virol* 87:3425–3434.
- 809 38. Juo ZS, Chiu TK, Leiberman PM, Baikalov I, Berk AJ, Dickerson RE. 1996. How  
810 proteins recognize the TATA box. *J Mol Biol* 261:239–254.
- 811 39. Baker CC, Ziff EB. 1981. Promoters and heterogeneous 5' termini of the  
812 messenger RNAs of adenovirus serotype 2. *J Mol Biol* 149:189–221.
- 813 40. Shahbazian MD, Grunstein M. 2007. Functions of site-specific histone acetylation  
814 and deacetylation. *Annu Rev Biochem* 76:75–100.
- 815 41. Ou HD, Phan S, Deerinck TJ, Thor A, Ellisman MH, O'Shea CC. 2017.  
816 ChromEMT: Visualizing 3D chromatin structure and compaction in interphase and  
817 mitotic cells. *Science* (80- ) 357:eaag0025.
- 818 42. Filippakopoulos P, Picaud S, Mangos M, Keates T, Lambert J-P, Barseyte-Lovejoy  
819 D, Felletar I, Volkmer R, Müller S, Pawson T, Gingras A-C, Arrowsmith CH,  
820 Knapp S. 2012. Histone recognition and large-scale structural analysis of the  
821 human bromodomain family. *Cell* 149:214–231.
- 822 43. Kanno T, Kanno Y, Siegel RM, Jang MK, Lenardo MJ, Ozato K. 2004. Selective  
823 recognition of acetylated histones by bromodomain proteins visualized in living  
824 cells. *Mol Cell* 13:33–43.
- 825 44. Schaukowitch K, Joo J-Y, Liu X, Watts JK, Martinez C, Kim T-K. 2014. Enhancer  
826 RNA facilitates NELF release from immediate early genes. *Mol Cell* 56:29–42.
- 827 45. Ferrari R, Su T, Li B, Bonora G, Oberai A, Chan Y, Sasidharan R, Berk AJ,  
828 Pellegrini M, Kurdistani SK. 2012. Reorganization of the host epigenome by a

829 viral oncogene. *Genome Res* 22:1212–1221.

830

831
